CORRECTION

# Correction: Iron deficiency associates with deterioration in several symptoms independently from hemoglobin level among chronic hemodialysis patients

Shuta Motonishi, Kentaro Tanaka, Takashi Ozawa

[Fig 5](#) is incorrect. The authors have provided a corrected version here.

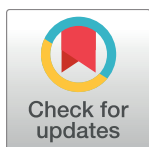

## OPEN ACCESS

**Citation:** Motonishi S, Tanaka K, Ozawa T (2018) Correction: Iron deficiency associates with deterioration in several symptoms independently from hemoglobin level among chronic hemodialysis patients. PLoS ONE 13(9): e0204789. <https://doi.org/10.1371/journal.pone.0204789>

**Published:** September 24, 2018

**Copyright:** © 2018 Motonishi et al. This is an open access article distributed under the terms of the [Creative Commons Attribution License](#), which permits unrestricted use, distribution, and reproduction in any medium, provided the original author and source are credited.

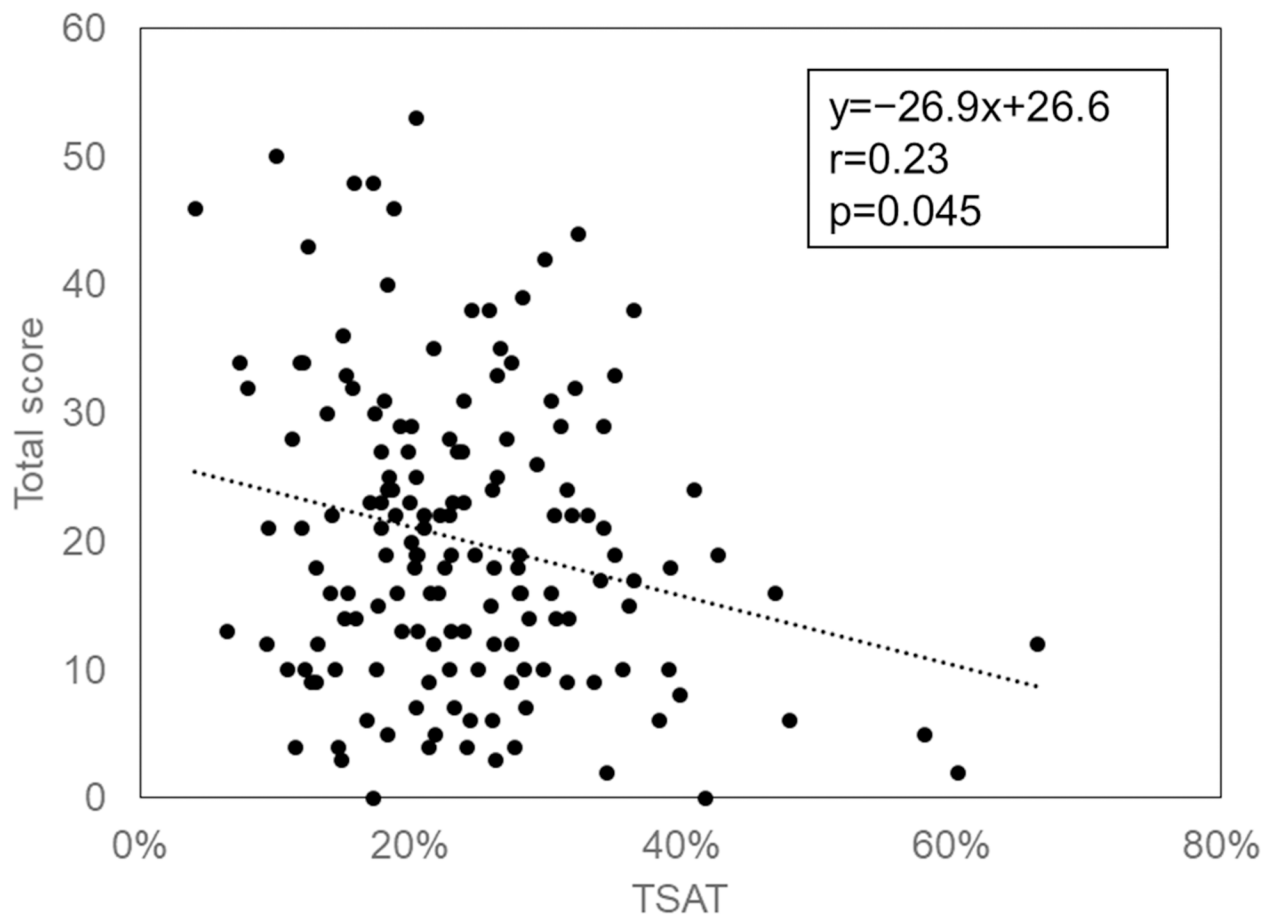

**Fig 5. Relationship between TSAT and total score.** The strength of linear association between TSAT and total symptom questionnaire score was analyzed by Spearman's correlation coefficient. TSAT: transferrin saturation.

<https://doi.org/10.1371/journal.pone.0204789.g001>

## Reference

1. Motonishi S, Tanaka K, Ozawa T (2018) Iron deficiency associates with deterioration in several symptoms independently from hemoglobin level among chronic hemodialysis patients. PLoS ONE 13(8): e0201662. <https://doi.org/10.1371/journal.pone.0201662> PMID: 30071093
